# Supplementary material
Source: HighWire-hosted journal article supplement (https://www.cmajopen.ca/highwire/filestream/80867/field_highwire_adjunct_files/0/open-2015-0061-1-at.pdf)
Supplement: open-2015-0061-1-at.pdf [file open-2015-0061-1-at.pdf]

## Appendix 1 (as supplied by the authors): MEDLINE research

1. ((brain injury\*[TIAB] OR brain injuries [TIAB] OR brain injured [TIAB] OR brain injure [TIAB] OR brain injures [TIAB] OR brain trauma [TIAB] OR brain traumas [TIAB] OR brain traumatic\* [TIAB] OR brain[TIAB] OR

brains injury\* [TIAB] OR brains injuries [TIAB] OR brains injured [TIAB] OR brains injure [TIAB] OR brains injures [TIAB] OR brains trauma [TIAB] OR brains traumas [TIAB] OR brains traumatic\* [TIAB] OR brains[TIAB] OR

brainstem\* injury\* [TIAB] OR brainstem\* injuries [TIAB] OR brainstem\* injured [TIAB] OR brainstem\* injure [TIAB] OR brainstem\* injures [TIAB] OR brainstem\* trauma [TIAB] OR brainstem\* traumas [TIAB] OR brainstem\* traumatic\* [TIAB] OR brainstem\*[TIAB] OR

head injury\* [TIAB] OR head injuries [TIAB] OR head injured [TIAB] OR head injure [TIAB] OR head injures [TIAB] OR head trauma [TIAB] OR head traumas [TIAB] OR head traumatic\* [TIAB] OR head[TIAB] OR

heads[TIAB] OR heads injuries [TIAB] OR heads injured [TIAB] OR heads injure [TIAB] OR heads injures [TIAB] OR heads trauma [TIAB] OR heads traumas [TIAB] OR heads traumatic\* [TIAB] OR heads[TIAB] OR

craniocerebral\* injury\* [TIAB] OR craniocerebral\* injuries [TIAB] OR craniocerebral\* injured [TIAB] OR craniocerebral\* injure [TIAB] OR craniocerebral\* injures [TIAB] OR craniocerebral\* trauma [TIAB] OR craniocerebral\* traumas [TIAB] OR craniocerebral\* traumatic\* [TIAB] OR craniocerebral\*[TIAB] OR

intracrani\* injury\* [TIAB] OR intracrani\* injuries [TIAB] OR intracrani\* injured [TIAB] OR intracrani\* injure [TIAB] OR intracrani\* injures [TIAB] OR intracrani\* trauma [TIAB] OR intracrani\* traumas [TIAB] OR intracrani\* traumatic\* [TIAB] OR intracrani\*[TIAB] OR

intra-crani\* injury\* [TIAB] OR intra-crani\* injuries [TIAB] OR intra-crani\* injured [TIAB] OR intra-crani\* injure [TIAB] OR intra-crani\* injures [TIAB] OR intra-crani\* trauma [TIAB] OR intra-crani\* traumas [TIAB] OR intra-crani\* traumatic\* [TIAB] OR intra-crani\*[TIAB] OR

intercrani\* injury\* [TIAB] OR intercrani\* injuries [TIAB] OR intercrani\* injured [TIAB] OR intercrani\* injure [TIAB] OR intercrani\* injures [TIAB] OR intercrani\* trauma [TIAB] OR intercrani\* traumas [TIAB] OR intercrani\* traumatic\* [TIAB] OR intercrani\*[TIAB] OR

inter-crani\* injury\* [TIAB] OR inter-crani\* injuries [TIAB] OR inter-crani\* injured [TIAB] OR inter-crani\* injure [TIAB] OR inter-crani\* injures [TIAB] OR inter-crani\* trauma [TIAB] OR inter-crani\* traumas [TIAB] OR inter-crani\* traumatic\* [TIAB] OR inter-crani\*[TIAB] OR

cerebr\* injury\* [TIAB] OR cerebr\* injuries [TIAB] OR cerebr\* injured [TIAB] OR cerebr\* injure [TIAB] OR cerebr\* injures [TIAB] OR cerebr\* trauma [TIAB] OR cerebr\* traumas [TIAB] OR cerebr\* traumatic\* [TIAB] OR cerebr\*[TIAB] OR

Appendix to: Mercier E, Boutin A, Shemilt M, et al. Predictive value of neuron-specific enolase for prognosis in patients with moderate or severe traumatic brain injury: a systematic review and meta-analysis. *CMAJ Open* 2016.

DOI:10.9778/cmajo.20150061. Copyright © 2016 The Author(s) or their employer(s).

To receive this resource in an accessible format, please contact us at [cmajgroup@cmaj.ca](mailto:cmajgroup@cmaj.ca).

cerebel\* injury\* [TIAB] OR cerebel\* injuries [TIAB] OR cerebel\* injured [TIAB] OR cerebel\* injure [TIAB] OR cerebel\* injures [TIAB] OR cerebel\* trauma [TIAB] OR cerebel\* traumas [TIAB] OR cerebel\* traumatic\* [TIAB] OR cerebel\*[TIAB] OR

forebrain\* injury\* [TIAB] OR forebrain\* injuries [TIAB] OR forebrain\* injured [TIAB] OR forebrain\* injure [TIAB] OR forebrain\* injures [TIAB] OR forebrain\* trauma [TIAB] OR forebrain\* traumas [TIAB] OR forebrain\* traumatic\* [TIAB] OR forebrain\*[TIAB]) AND

(injury\*[TIAB] OR injuries[TIAB] OR injured[TIAB] OR injure[TIAB] OR injures[TIAB] OR trauma[TIAB] OR traumas[TIAB] OR traumatic\*[TIAB] OR traumato\*[TIAB] OR damag\*[TIAB])) OR

TBI[TIAB] OR Glasgow coma scale[TIAB] OR GCS[TIAB] OR

Craniocerebral Trauma[MeSH:noexp] OR Brain Injuries[Mesh:NoExp] OR Brain Hemorrhage, Traumatic[Mesh] OR Diffuse Axonal Injury[Mesh:NoExp] OR Coma, Post-Head Injury[Mesh:NoExp] OR Head Injuries, Closed[Mesh:NoExp] OR Intracranial Hemorrhage, Traumatic[Mesh] OR Glasgow coma scale[Mesh]

**2.** biomarker\*[TIAB] OR biologic marker\*[TIAB] OR biological marker\*[TIAB] OR biochemical marker\*[TIAB] OR laboratory marker\*[TIAB] OR immunological marker\*[TIAB] OR immune marker\*[TIAB] OR serum marker\*[TIAB] OR clinical marker\*[TIAB] OR surrogate end point\*[TIAB] OR surrogate endpoint\*[TIAB] OR Biological Markers[MeSH] OR

neuronal protein\*[TIAB] OR nerve tissue protein\*[TIAB] OR Nerve Tissue Proteins[MeSH] OR

astrocyte protein\*[TIAB] OR

NSE[TIAB] OR neuron specific enolase\*[TIAB] OR gamma-enolase\*[TIAB] OR enolase 2[TIAB] OR nervous system specific enolase\*[TIAB] OR phosphopyruvate hydratase\*[TIAB] OR Phosphopyruvate Hydratase[Mesh] OR

**3.** incidence[MeSH:noexp] OR mortality[MeSH Terms] OR follow up studies[MeSH:noexp] OR prognos\*[Text Word] OR predict\*[Text Word] OR course\*[Text Word]

**4.** #1 AND #2 AND #3

**5.** animals[mh] NOT humans[mh]

**6.** #4 not #5
